# Supplementary material
Source: PubMed Central journal article supplement (PMC8627468)

# Genome-wide association studies of survival in 1,520 cancer patients treated with bevacizumab-containing regimens

Julia C.F. Quintanilha, Jin Wang, Alexander B. Sibley, Wei Xu, Osvaldo Espin-Garcia, Chen Jiang, Amy S. Etheridge, Mark J. Ratain, Heinz-Josef Lenz, Monica Bertagnolli, Hedy L. Kindler, Maura N. Dickler, Alan Venook, Geoffrey Liu, Kouros Owzar, Danyu Lin, Federico Innocenti

## Table of Contents

|                                                                                                                                                                          |   |
|--------------------------------------------------------------------------------------------------------------------------------------------------------------------------|---|
| <b>Table S1.</b> Results of the association between SNPs and OS as a prognostic effect and as a predictive effect for each study .....                                   | 1 |
| <b>Table S2.</b> Results of the association between prognostic SNPs and OS in TCGA patients .....                                                                        | 2 |
| <b>Fig. S1</b> CONSORT and quality control flowchart for CALGB 80303, 40503, 80405, and ICON7 .....                                                                      | 3 |
| <b>Fig. S2</b> Manhattan plot (left) and quantile-quantile (Q-Q) plot (right) from SNP-based association results .....                                                   | 4 |
| <b>Fig. S3</b> Association between (A) <i>PRUNE2</i> and (B) <i>BARD1</i> mRNA expression and SNPs in COAD+READ and OV patients from TCGA .....                          | 5 |
| <b>Fig. S4</b> Position of rs680949 (T>C/A>G) in <i>PRUNE2</i> relative to the Myc transcription factor binding motif and effect of the allele change (T versus C) ..... | 6 |
| <b>Fig. S5</b> Association of rs368962482 (G>A, complete LD, $R^2=1.0$ , with rs16852804) with <i>BARD1</i> mRNA expression in monocytes.....                            | 7 |
| <b>Fig. S6</b> Kaplan-Meier estimates of OS for rs3795897 in <i>AGAP1</i> (G>A, MAF 0.11-0.17), predictive effect.....                                                   | 8 |

## Supplementary Table and Figures

**Table S1. Results of the association between SNPs and OS as a prognostic effect and as a predictive effect for each study. Rows in bold are those with p-value<0.05 in at least three out of four trials. NA** SNP not present in the genotyping platform of the trial.

|                          | CALGB 80303   |                 |                         | CALGB 40503   |                 |                         | CALGB 80405                |                 |                         | ICON7         |                 |                         |
|--------------------------|---------------|-----------------|-------------------------|---------------|-----------------|-------------------------|----------------------------|-----------------|-------------------------|---------------|-----------------|-------------------------|
| <b>Prognostic effect</b> |               |                 |                         |               |                 |                         |                            |                 |                         |               |                 |                         |
| SNP                      | p-value       | Effect size (β) | HR (95% CI)             | p-value       | Effect size (β) | HR (95% CI)             | p-value                    | Effect size (β) | HR (95% CI)             | p-value       | Effect size (β) | HR (95% CI)             |
| rs680949                 | <b>0.0340</b> | <b>0.34</b>     | <b>1.40 (1.03-1.92)</b> | <b>0.0357</b> | <b>0.59</b>     | <b>1.80 (1.04-3.12)</b> | <b>0.0004</b>              | <b>0.44</b>     | <b>1.55 (1.21-1.97)</b> | <b>0.0035</b> | <b>0.65</b>     | <b>1.92 (1.24-2.99)</b> |
| rs218527                 | <b>0.0039</b> | <b>0.44</b>     | <b>1.56 (1.15-2.10)</b> | <b>0.0281</b> | <b>0.43</b>     | <b>1.53 (1.05-2.25)</b> | <b>4.8x10<sup>-5</sup></b> | <b>0.44</b>     | <b>1.55 (1.26-1.92)</b> | <b>0.6642</b> | <b>0.09</b>     | <b>1.09 (0.74-1.62)</b> |
| rs2795492                | 0.0466        | -0.17           | 0.84 (0.71-1.00)        | 0.2723        | -0.16           | 0.85 (0.64-1.14)        | 1.6x10 <sup>-5</sup>       | -0.30           | 0.74 (0.65-0.85)        | 0.7248        | -0.05           | 0.95 (0.72-1.25)        |
| rs476612                 | NA            | NA              | NA                      | <b>0.0357</b> | <b>0.59</b>     | <b>1.80 (1.04-3.12)</b> | <b>0.0060</b>              | <b>0.44</b>     | <b>1.55 (1.13-2.11)</b> | <b>0.0035</b> | <b>0.65</b>     | <b>1.91 (1.24-2.94)</b> |
| rs7615734                | 0.0015        | 0.37            | 1.45 (1.15-1.83)        | 0.0816        | 0.31            | 1.36 (0.96-1.93)        | 0.0024                     | 0.24            | 1.28 (1.09-1.50)        | 0.8265        | 0.04            | 1.04 (0.75-1.44)        |
| rs6712389                | NA            | NA              | NA                      | 0.1487        | -0.23           | 0.80 (0.58-1.09)        | 0.0001                     | -0.29           | 0.75 (0.65-0.87)        | 0.0963        | -0.28           | 0.76 (0.54-1.05)        |
| rs16852804               | 0.0018        | 0.52            | 1.68 (1.21-2.34)        | 0.0667        | 0.40            | 1.50 (0.97-2.30)        | 0.0751                     | 0.29            | 1.33 (0.97-1.82)        | 0.0536        | 0.48            | 1.61 (0.99-2.62)        |
| rs10950639               | NA            | NA              | NA                      | 0.0788        | 0.32            | 1.37 (0.96-1.95)        | 0.0004                     | 0.28            | 1.32 (1.13-1.55)        | 0.0722        | 0.29            | 1.34 (0.97-1.85)        |
| rs4807493                | 0.0009        | -0.33           | 0.72 (0.59-0.87)        | 0.8503        | 0.03            | 1.03 (0.74-1.43)        | 0.0029                     | -0.26           | 0.77 (0.65-0.92)        | 0.2037        | -0.24           | 0.79 (0.54-1.14)        |
| rs2103445                | NA            | NA              | NA                      | 0.0176        | 0.35            | 1.42 (1.06-1.89)        | 0.0004                     | 0.26            | 1.29 (1.12-1.49)        | 0.4325        | 0.13            | 1.13 (0.83-1.55)        |
| <b>Predictive effect</b> |               |                 |                         |               |                 |                         |                            |                 |                         |               |                 |                         |
| SNP                      | p-value       | Effect size (β) |                         | p-value       | Effect size (β) |                         | p-value                    | Effect size (β) |                         | p-value       | Effect size (β) |                         |
| rs4969481                | 0.0093        | -0.66           |                         | 0.1896        | -0.45           |                         | 2.4x10 <sup>-5</sup>       | -0.80           |                         | 0.1114        | -0.71           |                         |
| rs11895736               | 0.1429        | -0.38           |                         | 0.1474        | -0.61           |                         | 1.6x10 <sup>-5</sup>       | -0.83           |                         | 0.0497        | -0.81           |                         |
| rs448960                 | NA            | NA              |                         | 0.1462        | -0.41           |                         | 0.0004                     | -0.60           |                         | 0.0161        | -0.70           |                         |
| rs10763269               | 0.0001        | 0.80            |                         | 0.1134        | 0.52            |                         | 0.0730                     | 0.28            |                         | 0.1595        | 0.49            |                         |
| rs13392750               | NA            | NA              |                         | 0.0183        | 0.68            |                         | 0.0003                     | 0.63            |                         | 0.2677        | -0.32           |                         |
| rs3795897                | <b>0.0101</b> | <b>0.64</b>     |                         | <b>0.2479</b> | <b>0.47</b>     |                         | <b>0.0333</b>              | <b>0.59</b>     |                         | <b>0.0037</b> | <b>1.22</b>     |                         |
| rs1150743                | 0.0027        | 0.83            |                         | 0.0938        | 0.85            |                         | 0.0148                     | 0.52            |                         | 0.2130        | 0.64            |                         |
| rs10915428               | 0.2065        | -0.22           |                         | 0.3642        | -0.27           |                         | 0.0000                     | 0.52            |                         | 0.2259        | -0.34           |                         |
| rs11860804               | NA            | NA              |                         | 0.7598        | -0.10           |                         | 0.0001                     | -0.53           |                         | 0.0214        | -0.64           |                         |
| rs6453031                | NA            | NA              |                         | 0.3486        | -0.34           |                         | 0.0002                     | -0.65           |                         | 0.0304        | -0.88           |                         |

**Table S2. Results of the association between prognostic SNPs and OS in TCGA patients.** SNPs in bold are those tested for association. P-values in bold are for SNPs that replicated in TCGA. *TCGA* The Cancer Genome Atlas, *COAD* colon adenocarcinoma, *READ* rectum adenocarcinoma, *OV* ovarian serous cystadenocarcinoma, *LD* linkage disequilibrium, *MAF* minor allele frequency, *NA* Intergenic SNP, *HR* hazard ratio, *CI* confidence interval.

| SNP               | Gene                 | Genotyped in TCGA | SNP in LD (proxy)                       | MAF (COAD+READ / OV) | p-value (COAD+READ / OV) | HR (95% CI) (COAD+READ / OV)         | p-value (meta-analysis)     | HR (95% CI) (meta-analysis) |
|-------------------|----------------------|-------------------|-----------------------------------------|----------------------|--------------------------|--------------------------------------|-----------------------------|-----------------------------|
| <b>rs680949</b>   | <b><i>PRUNE2</i></b> | Yes               | -                                       | 0.11 / 0.12          | 0.0529 / 0.1860          | 1.76 (0.99-3.11) / 1.44 (0.84-2.48)  | <b>0.0219</b>               | <b>1.58 (1.07-2.35)</b>     |
| rs218527          | NA                   | No                | <b>rs218529</b> (R <sup>2</sup> =1.0)   | 0.11 / 0.10          | 0.0687 / 0.0493          | 0.37 (0.13-1.08) / 1.84 (1.00-3.36)  | 0.4990                      | 1.16 (0.75-1.79)            |
| rs2795492         | <i>CORO2A</i>        | No                | rs2250494 (R <sup>2</sup> =0.57)        | -                    | -                        | -                                    | -                           | -                           |
| rs476612          | <i>LOC100129762</i>  | No                | rs680949 (R <sup>2</sup> =1.0)          | -                    | -                        | -                                    | -                           | -                           |
| <b>rs7615734</b>  | NA                   | Yes               | -                                       | 0.17 / 0.25          | 0.2984 / 0.4110          | 0.72 (0.39-1.34) / 1.19 (0.82-1.41)  | 0.2446                      | 1.22 (0.87-1.72)            |
| rs6712389         | NA                   | No                | <b>rs10490715</b> (R <sup>2</sup> =1.0) | 0.22 / 0.35          | 0.4197 / 0.3200          | 1.29 (0.69-2.41) / 1.20 (0.84-1.72)  | 0.2062                      | 1.22 (0.90-1.67)            |
| rs16852804        | <i>BARD1</i>         | No                | <b>rs16852802</b> (R <sup>2</sup> =1.0) | 0.02 / 0.08          | 0.0127 / 0.0026          | 5.09 (1.41-18.33) / 2.71 (1.42-5.20) | <b>1.39x10<sup>-4</sup></b> | <b>3.09 (1.73-5.51)</b>     |
| <b>rs10950639</b> | NA                   | Yes               | -                                       | 0.27 / 0.24          | 0.9284 / 0.4810          | 1.03 (0.57-1.83) / 1.16 (0.76-1.78)  | 0.5347                      | 1.11 (0.79-1.57)            |
| rs4807493         | <i>PIP5K1C</i>       | No                | rs7253265 (R <sup>2</sup> =0.42)        | -                    | -                        | -                                    | -                           | -                           |
| <b>rs2103445</b>  | NA                   | Yes               | -                                       | 0.28 / 0.31          | 0.3320 / 0.8400          | 0.75 (0.42-1.34) / 0.96 (0.67-1.39)  | 0.4888                      | 0.90 (0.66-1.22)            |

**Fig. S1 CONSORT and quality control flowchart for CALGB 80303, 40503, 80405, and ICON7.** *MAF* minor allele frequency; *HWE* Hardy-Weinberg Equilibrium.

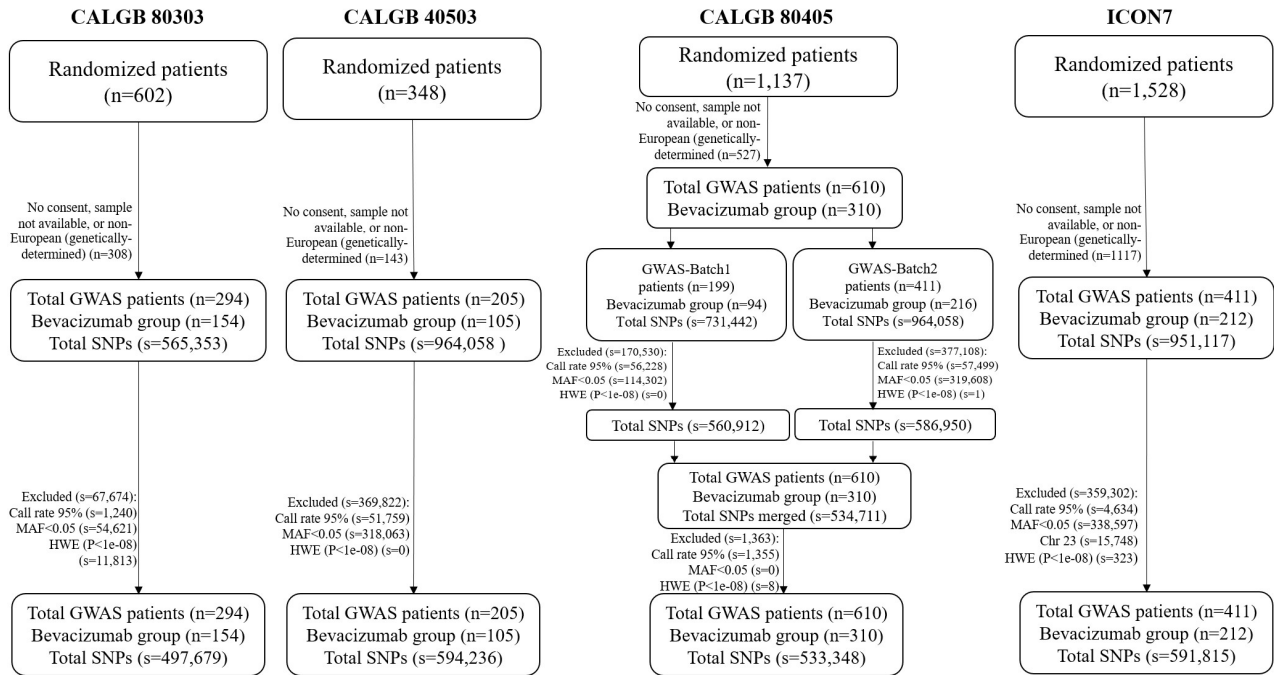

**Fig. S2** Manhattan plot (left) and quantile-quantile (Q-Q) plot (right) from SNP-based association results.

**Prognostic effect**

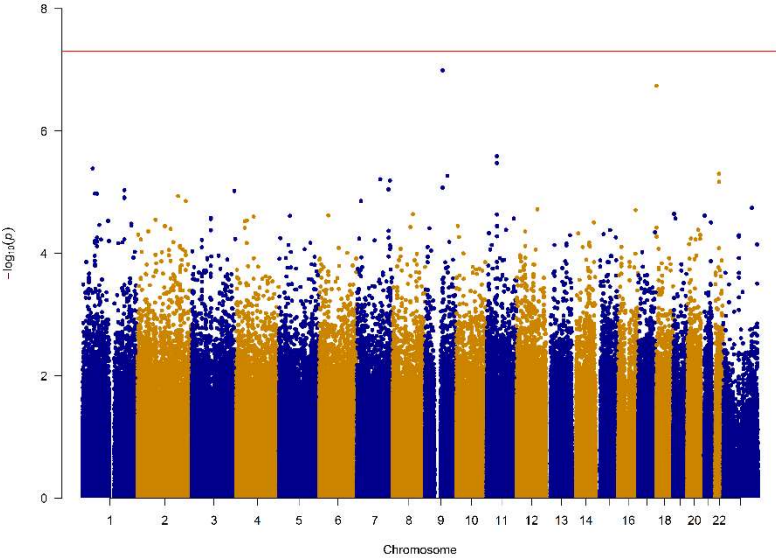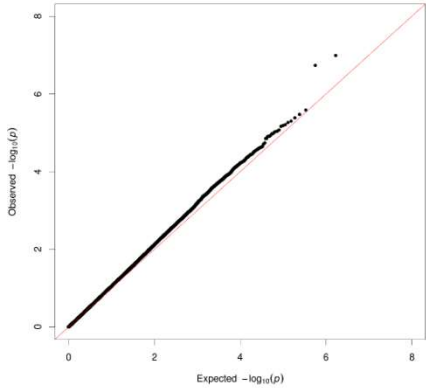

**Predictive effect**

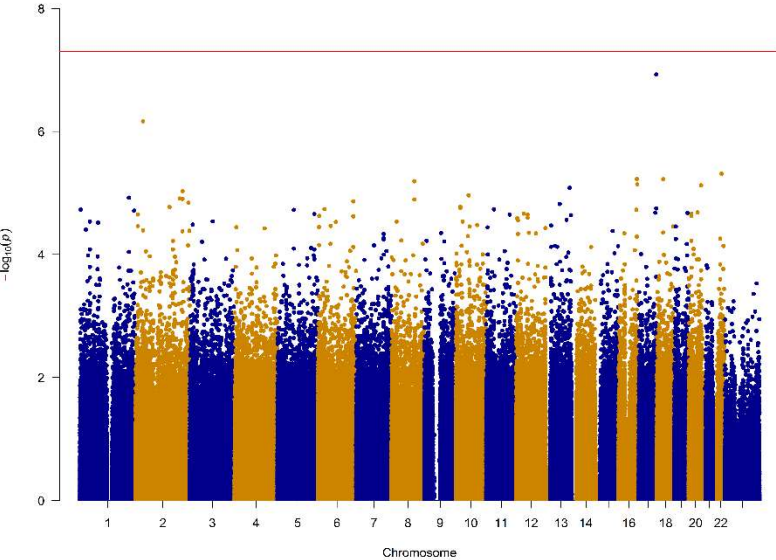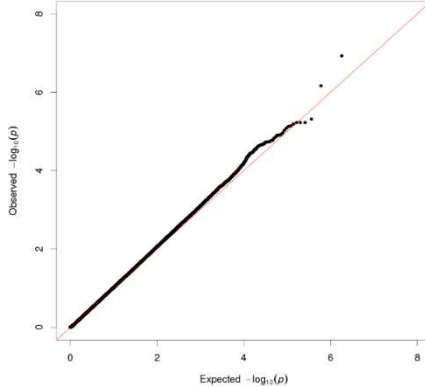

**Fig. S3 Association between (A) *PRUNE2* and (B) *BARD1* mRNA expression and SNPs in COAD+READ and OV patients from TCGA.**

**(A) *PRUNE2***

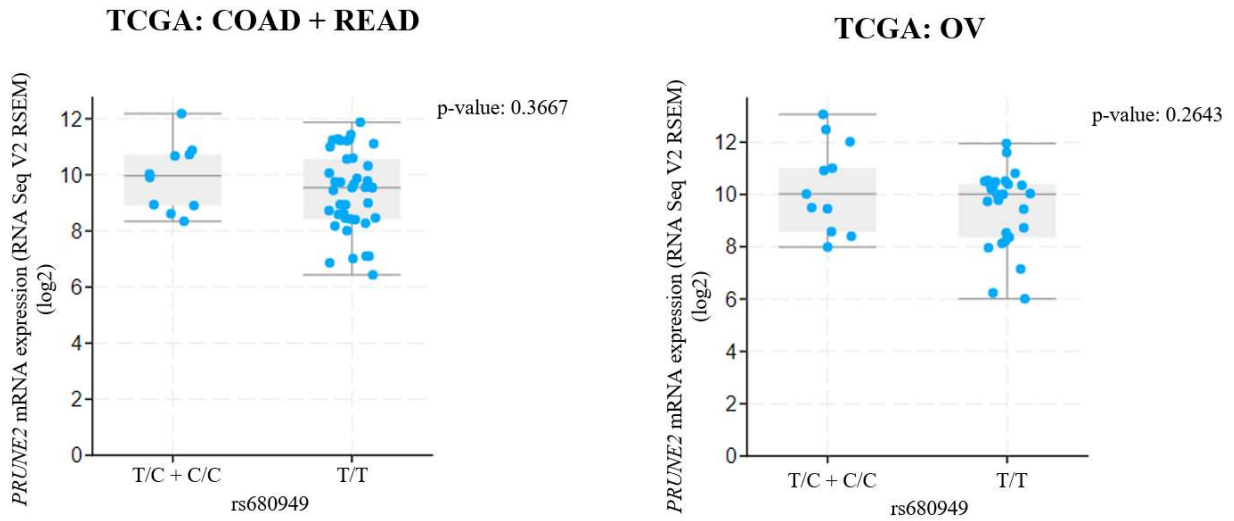

**(B) *BARD1***

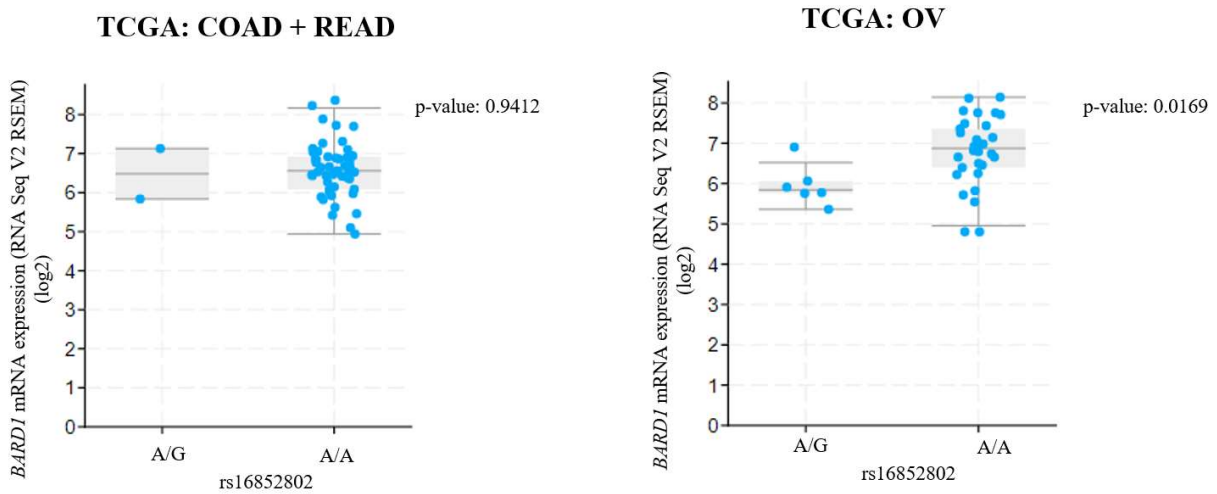

**Fig. S4 Position of rs680949 (T>C/A>G) in *PRUNE2* relative to the Myc transcription factor binding motif and effect of the allele change (T versus C).** Sequence logo from atSNP representing the JASPAR positional weight matrix of the Myc binding motif. The sequence of the putative regulatory region surrounding rs680949 (highlighted in gray), with the minor allele (C, top) or reference allele (T, bottom), is shown overlapping the JASPAR Myc binding motif. The height of the bases indicates the level of conservation across species, suggesting a regulatory role. rs680949 results in a nucleotide change from T to C in a conserved region of the Myc binding motif.

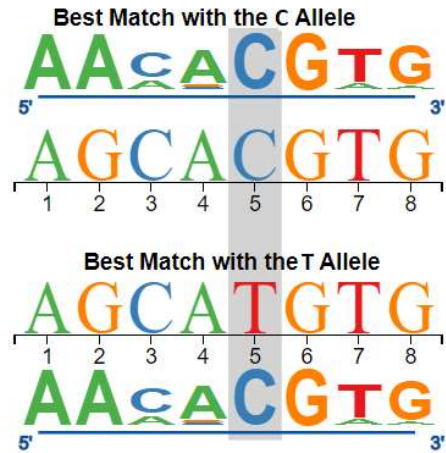

**Fig. S5 Association of rs368962482 (G>A, complete LD,  $R^2=1.0$ , with rs16852804) with *BARD1* mRNA expression in monocytes. Median, 25<sup>th</sup> and 75<sup>th</sup> percentiles, minimum and maximum values of *BARD1* transcripts per million (TPM). Data from the Database of Immune Cell eQTLs (DICE).**

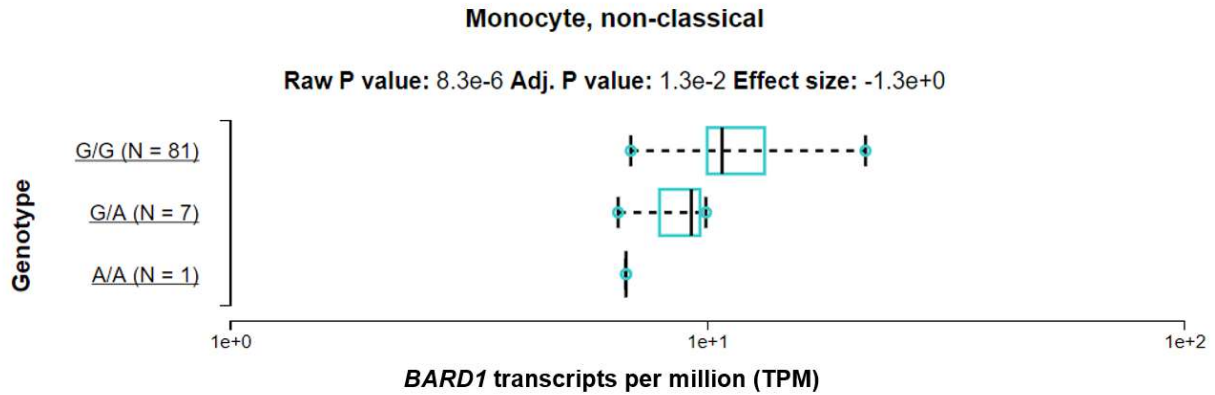



**Fig. S6 Kaplan-Meier estimates of OS for rs3795897 in *AGAP1* (G>A, MAF 0.11-0.17), predictive effect.** \*genotyped only in patients from the GWAS-Batch 1 (n=199, Fig. S1). *CALGB* Cancer and Leukemia Group B, *ICON7* International Collaboration on Ovarian Neoplasms; *OS* overall survival; *CI* confidence interval; *NR* not reached.

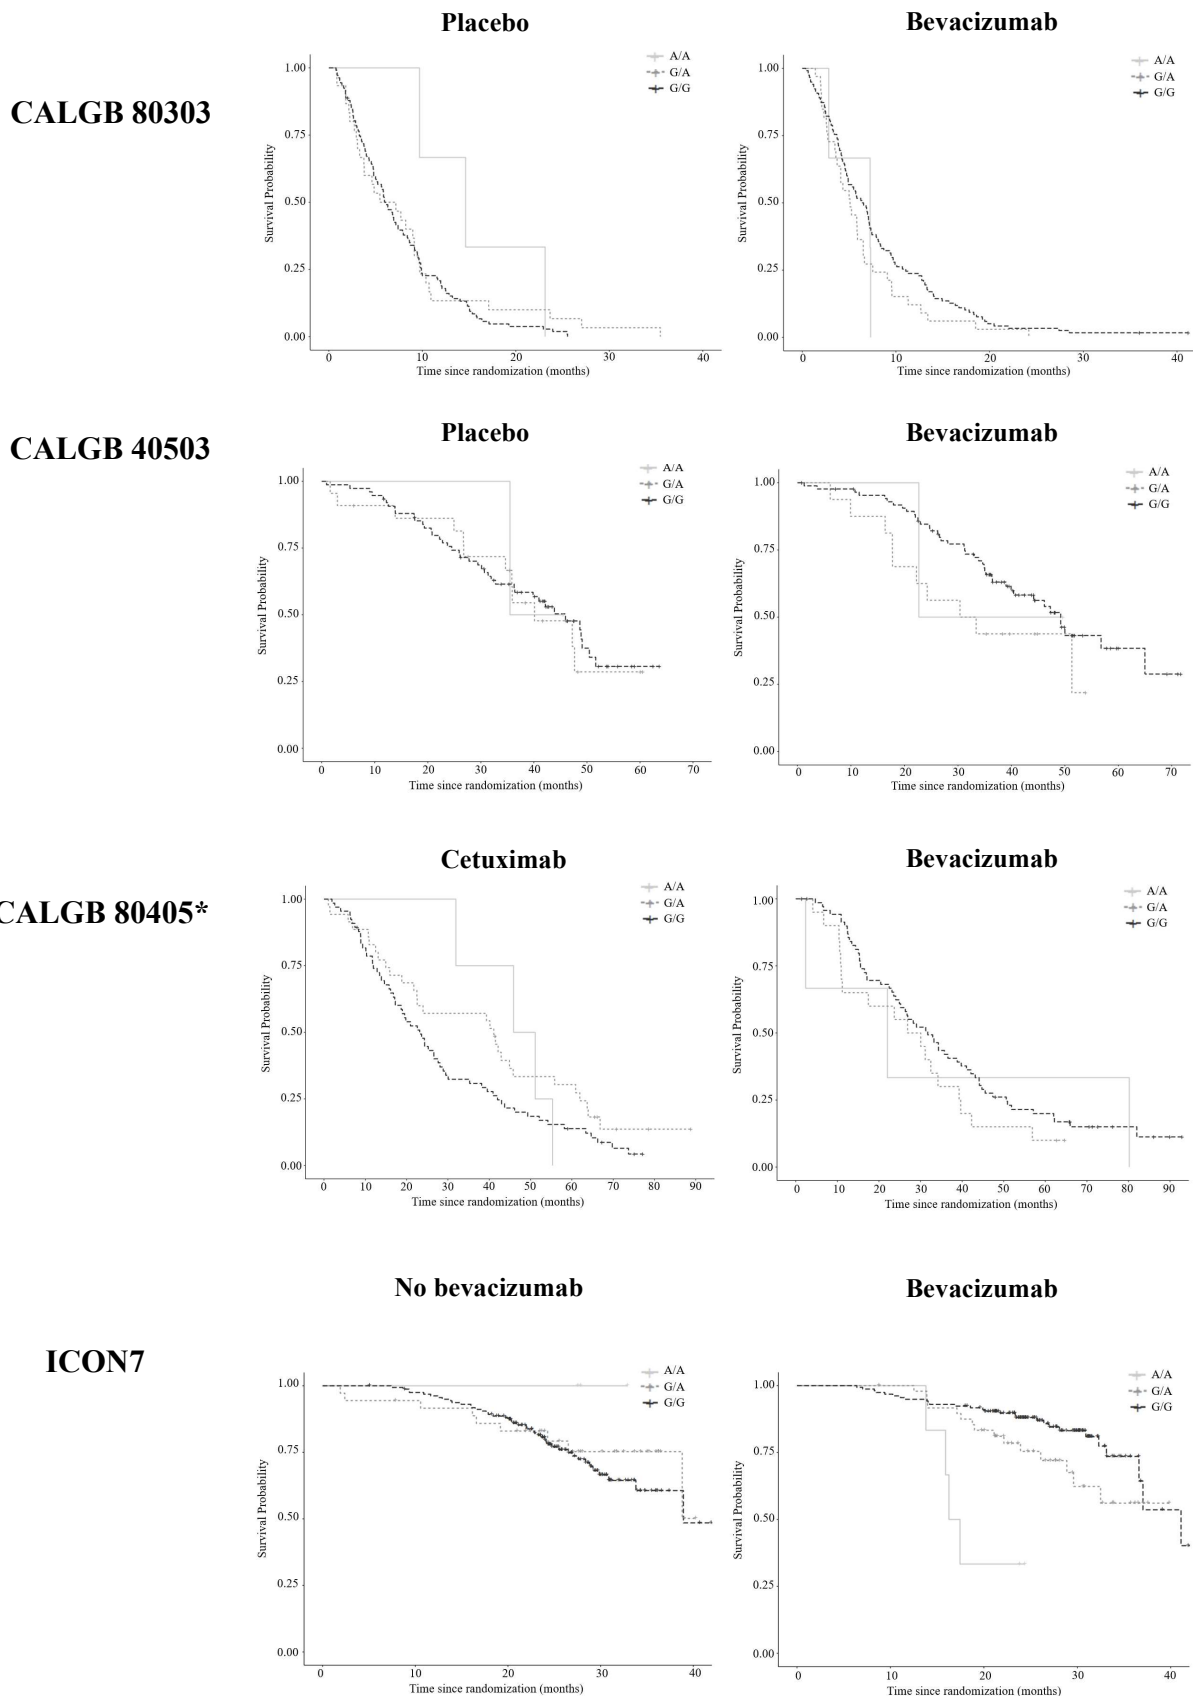

Supplement: NIHMS1740604-supplement-supinfo.pdf [file NIHMS1740604-supplement-supinfo.pdf]
